# Supplementary material
Source: Springer Nature journal article supplement (https://www.springermedizin.de/resource/supplementary/12968_2012_3286_MOESM12_ESM.pdf/9583546)

27/06/2006 09:16:41

V

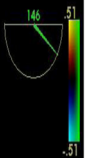

aortic valve

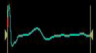

57  
HR

02/05/2006 23:16:54

V

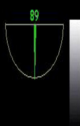

dissection flap

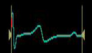

66  
HR

Supplement: MOESM12 [file 9583546]
